# Supplementary material
Source: publisher figshare collection journal article supplement (https://acs.figshare.com/ndownloader/files/12260315)
Supplement: Supplementary file 1 [file 12260315]

## Supporting Information

### **Body Compatible Thermometer Based on Green Electrolytes**

*Xinglei Tao,<sup>†</sup> Shenglong Liao,<sup>†</sup> Shuqiang Wang,<sup>‡</sup> Di Wu,<sup>‡</sup> Yapei Wang<sup>\*†</sup>*

<sup>†</sup>Department of Chemistry, Renmin University of China, Beijing, 100872, China

<sup>‡</sup>Department of Nephrology, Chinese PLA General Hospital, Chinese PLA Institute of Nephrology, State Key Laboratory of Kidney Diseases, National Clinical Research Center for Kidney Diseases, Beijing Key Laboratory of Kidney Disease, Beijing 100853, China

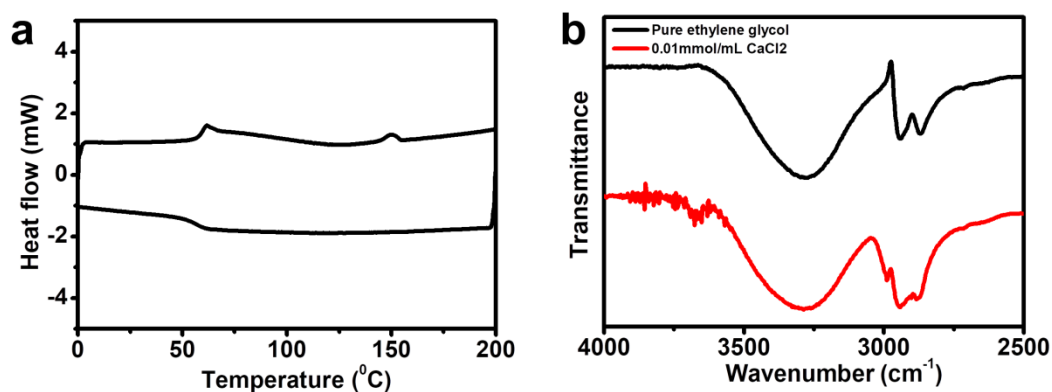

**Supporting Figure S1.** (a) DSC curve of unmodified PLA slice. (b) FT-IR spectra of pure ethylene glycol (black) and ethylene glycol dissolving 0.01 mol/L CaCl<sub>2</sub> (red).

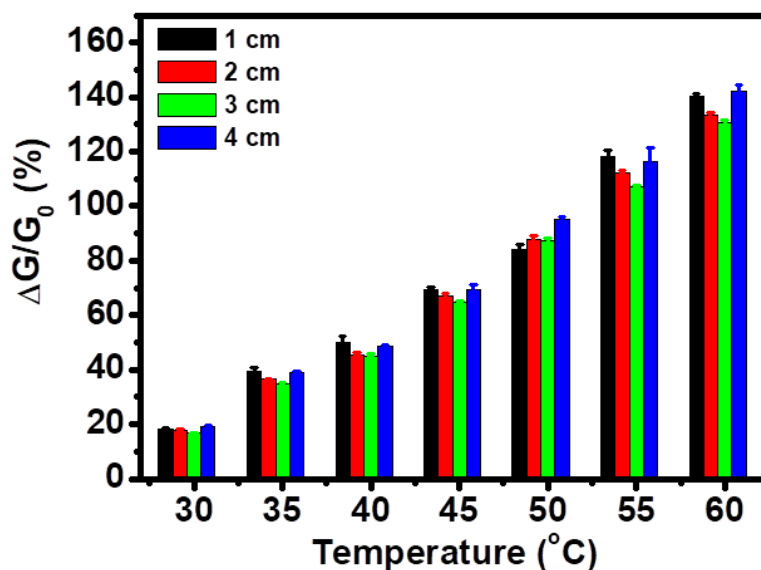

**Supporting Figure S2.** Thermal responses of thermal sensing fluids (ethylene glycol + 0.01 mol/L CaCl<sub>2</sub>) encapsulated in capillary tube with different length, including 1.0, 2.0, 3.0 and 4.0 cm.

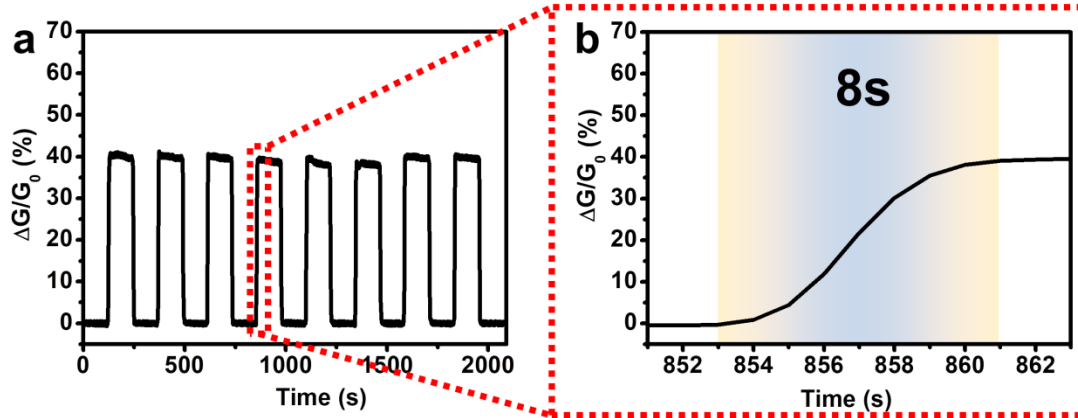

**Supporting Figure S3.** (a) On-off cycles of thermal responses of liquid thermometer operated under 35 °C and room temperature (25 °C) alternatively. (b) Enlarged view of one on-off sensing curve highlighted with red box in (a).

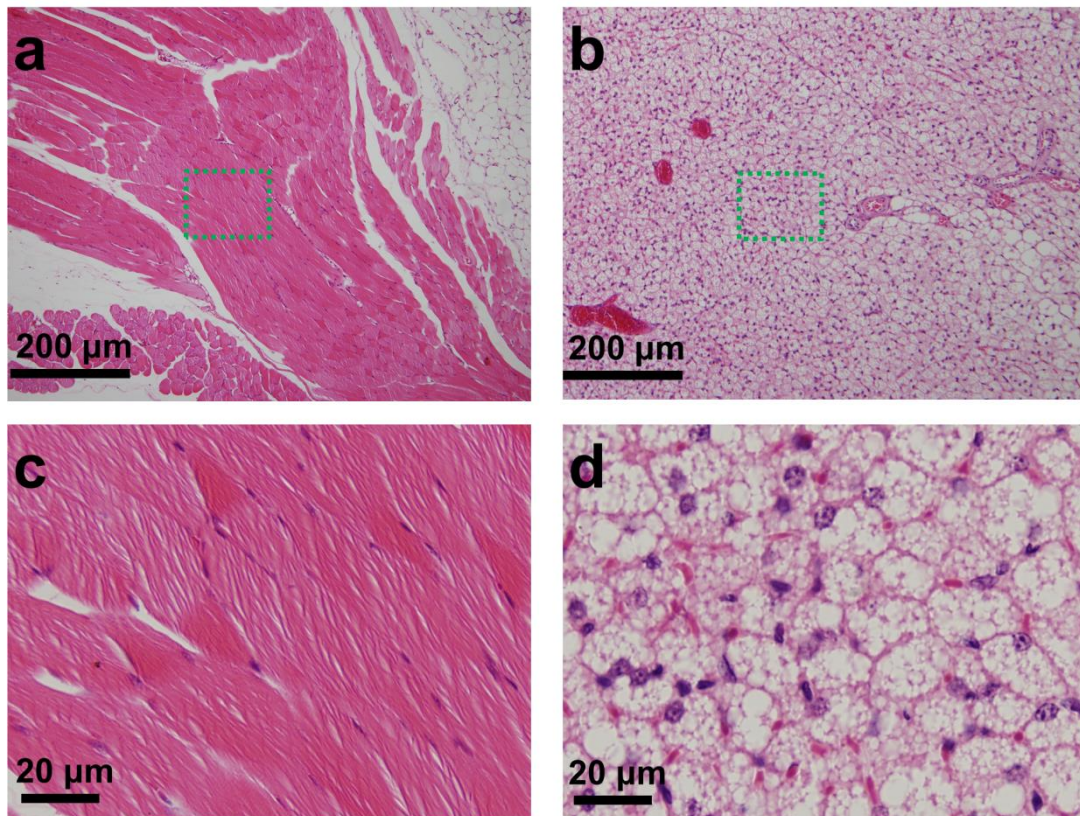

**Supporting Figure S4.** H&E staining of histological sections of muscular tissue (a) and adipose tissues (b) 2 weeks after the sensor was implanted into the mouse. The green dotted box region marked in (a) and (b) is magnified as (c) and (d), respectively.

**Supporting Table S1.** Thermal Sensitivity comparison between reported temperature sensors and our liquid-based thermometers.

| Temperature sensors                                  | Measurement range (°C) | Sensitivity                  |
|------------------------------------------------------|------------------------|------------------------------|
| CNWs/PDMS-based temperature sensor                   | 35-45                  | 0.214 °C <sup>-1</sup>       |
| Ni microparticle-filled binary polymer composite     | -                      | 0.1-0.90 °C <sup>-1</sup>    |
| Graphite powders in PDMS                             | 30-110                 | 0.286 °C <sup>-1</sup>       |
| rGO/PU temperature sensor                            | -                      | 0.0134 °C <sup>-1</sup>      |
| CNTs powder deposited on elastic polymer tape        | 20-70                  | -1.26% °C <sup>-1</sup>      |
| Water proof and vapor permeable temperature sensor   | 22-45                  | 0.002778 °C <sup>-1</sup>    |
| Pt/PI temperature sensor                             | 20-60                  | 0.00219 °C <sup>-1</sup>     |
| Temperature sensing fabric with Ni fibers            | 0-100                  | 0.0048 °C <sup>-1</sup>      |
| Temperature sensor including Au as the sensing layer | 30-80                  | 0.8 Ω °C <sup>-1</sup>       |
| A chemiresistor consisting of AuNP film              | 10-42                  | 0.41MΩ °C <sup>-1</sup>      |
| Ferroelectric rGO/PVDF composite film                | -2-64                  | 1.58% C <sup>-1</sup>        |
| PET/PEDOT:PSS/P3HT:PCBM /EGaIn                       | 20-150                 | 3.6% C <sup>-1</sup>         |
| Ionic liquid                                         | 25-60                  | 3.025% °C <sup>-1</sup>      |
| This work                                            | 10-60                  | 3.618-8.032% C <sup>-1</sup> |
